# Supplementary material for: MicroRNA expression as risk biomarker of breast cancer metastasis: a pilot retrospective case-cohort study
Source: PubMed Central journal article supplement (PMC4195914; doi:10.1186/1471-2407-14-739), 2014-10-02

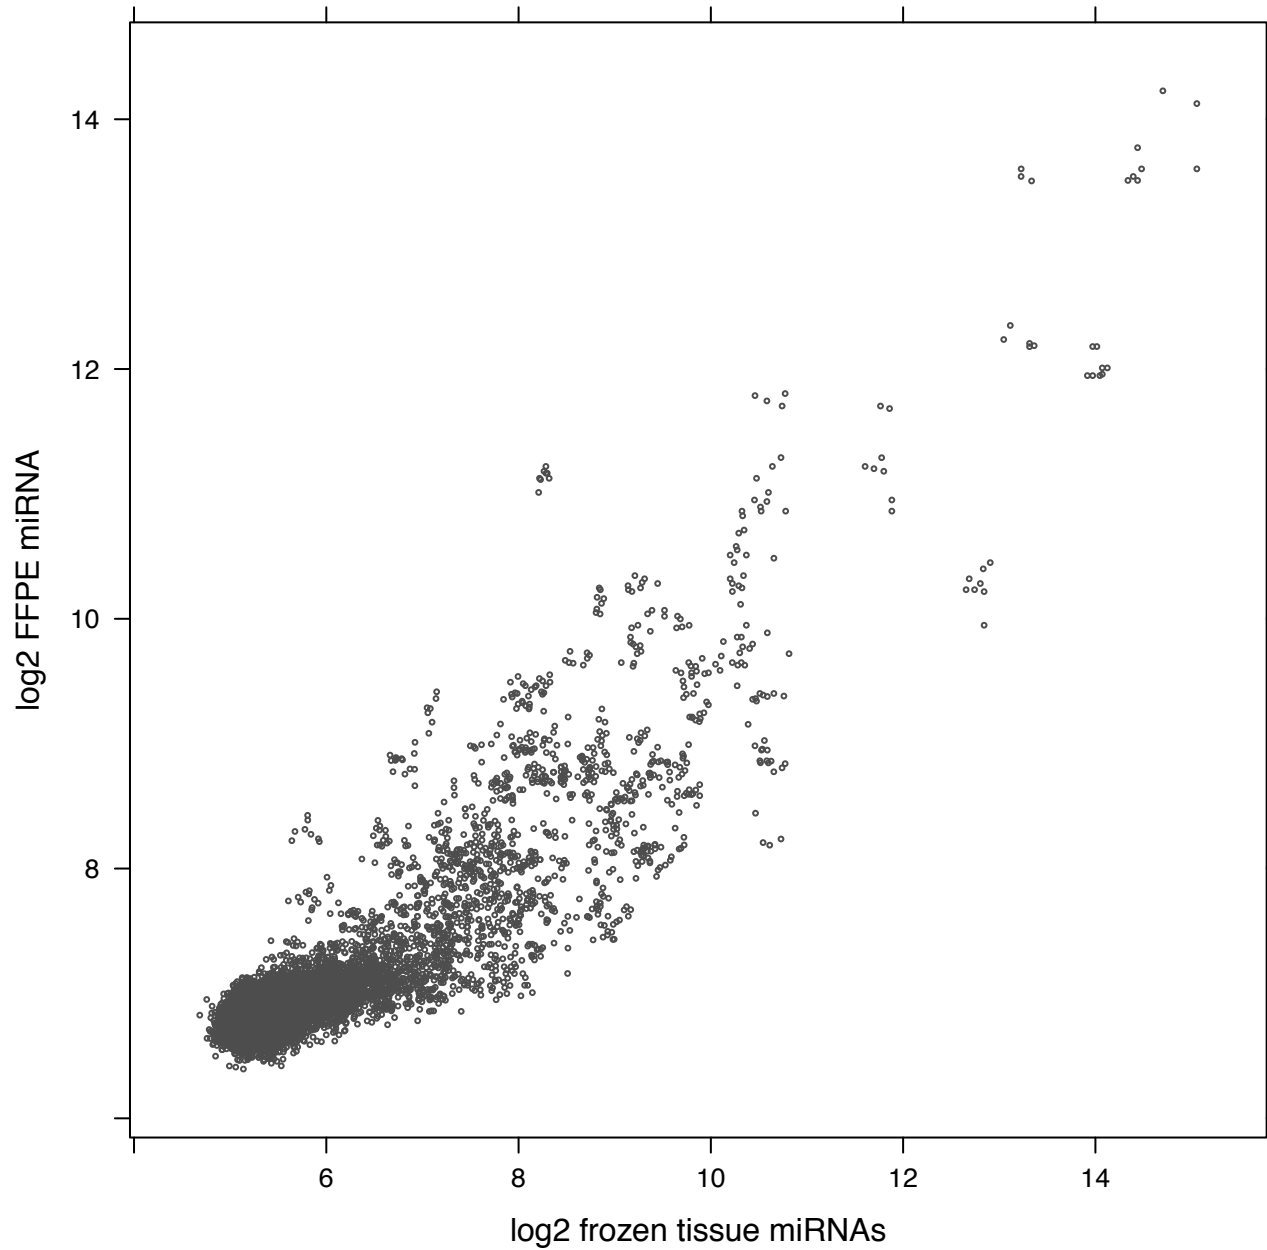

Supplement: 12885_2013_4924_MOESM1_ESM.pdf [file 12885_2013_4924_MOESM1_ESM.pdf]
